# Supplementary material
Source: PubMed Central journal article supplement (PMC4068527)
Supplement: AAC.00142-14_zac007143031so1.pdf [file AAC.00142-14_zac007143031so1.pdf]

**SUPPLEMENTAL MATERIAL**

***In vivo* assessment of drug efficacy against *Mycobacterium abscessus*  
using the embryonic zebrafish test system**

Audrey Bernut<sup>1</sup>, Vincent Le Moigne<sup>3</sup>, Tiffany Lesne<sup>1</sup>, Georges Lutfalla<sup>1</sup>,  
Jean-Louis Herrmann<sup>3</sup> and Laurent Kremer<sup>1,2,#</sup>

**A**

Microinjection of fluorescent bacteria  
into caudal vein at 30hpf

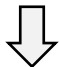

Incubate infected embryos  
for 3 days at 28.5 C

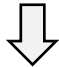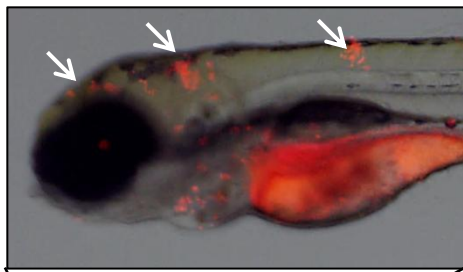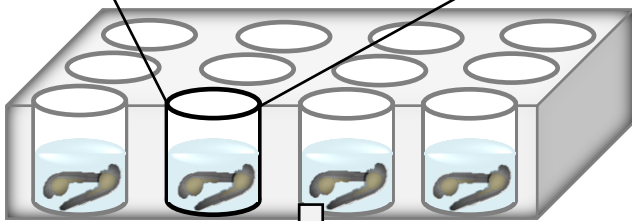

Add imipenem into wells  
Daily drug renewal for 5 days

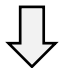

Drug activity assessment  
(monitoring survival and  
abscess evolution)

**B**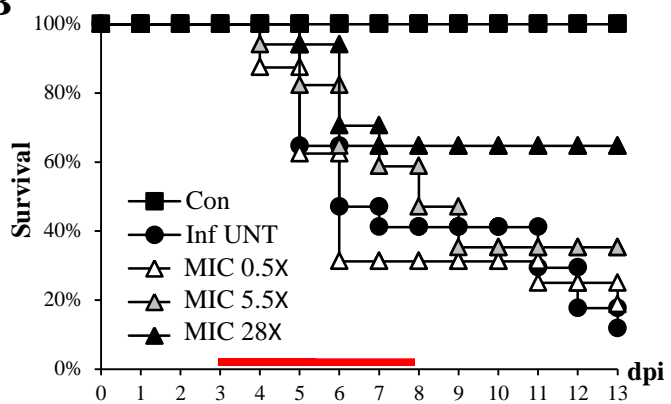**C**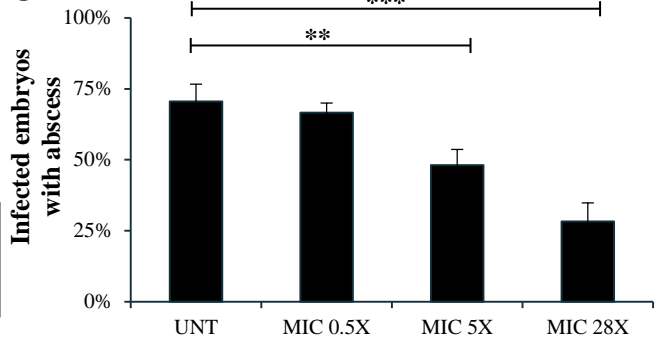**D**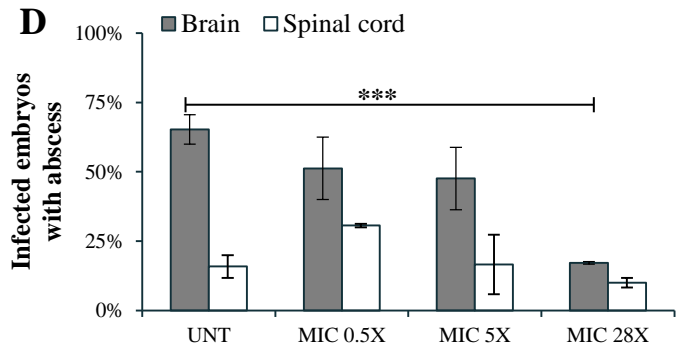

**Figure S1. Exposure to imipenem overcomes and protects against severe *M. abscessus* infections. (A-C)** tdTomato expressing *Mabs* ( $\approx 300$  CFU) were injected in 30hpf embryos. From 3dpi, embryos were exposed during 5 days to imipenem at 0.5X, 5X or 28X MIC. **(A)** Schematic representation illustrating the “curing” protocol used as well as the infection status of the embryos at 3dpi (numerous abscesses within the CNS) when the drug treatment is applied. **(B)** Survival of infected *Mabs* treated at various doses of imipenem and compared to untreated infected embryos ( $n=20-30$ ), representative of three independent experiments). A significant increased survival was observed in embryos exposed to the highest (28X MIC) imipenem dose. The red bar indicates the start and duration of treatment. **(C)** Frequency of *Mabs* abscesses in whole untreated or imipenem-treated embryos over 13dpi. Data are expressed as the average of three independent experiments. MIC 5X and MIC 28X imipenem treated-embryos infected by *Mabs* developed significantly fewer abscesses than untreated infected-embryos. **(D)** Average localization of abscesses of the infected embryos in (C). 28X MIC imipenem treated-embryos infected by *Mabs* developed significantly fewer abscesses within the brain than untreated infected-embryos. For (C) and (D) statistics were calculated using Fisher’s exact test comparing each category of imipenem-treated embryos to untreated control. All results are expressed as the average from two or three independent experiments and error bars represent the standard errors of the mean (SEM). \*\* $p < 0.01$ , \*\*\* $p < 0.001$ .

**Table S1.** Minimal inhibitory concentrations of several drugs against *M. abscessus* using the microdilution method in cation-adjusted Mueller-Hinton (MH) broth or on LB agar. Antibiotics used in infected ZF are shown in bold. Results are expressed in  $\mu\text{M}$  and  $\mu\text{g}/\text{mL}$ .

| Antibiotic            | Molecular weight | Solvent               | MIC<br>MH broth |                         | MIC<br>LB agar |                         |
|-----------------------|------------------|-----------------------|-----------------|-------------------------|----------------|-------------------------|
|                       |                  |                       | $\mu\text{M}$   | $\mu\text{g}/\text{mL}$ | $\mu\text{M}$  | $\mu\text{g}/\text{mL}$ |
| <b>Clarithromycin</b> | <b>748</b>       | <b>DMSO</b>           | <b>4</b>        | <b>3.0</b>              | <b>0.7</b>     | <b>0.5</b>              |
| Cefoxitin             | 427              | DMSO                  | 60              | 25.6                    | 35             | 15                      |
| Amikacin              | 586              | H <sub>2</sub> O      | 125             | 73.25                   | 26             | 15                      |
| Isoniazid             | 137              | H <sub>2</sub> O      | 1000            | 137                     | 365            | 50                      |
| Erythromycin          | 734              | DMSO                  | 125             | 91.75                   | 10             | 7.5                     |
| <b>Imipenem</b>       | <b>299</b>       | <b>H<sub>2</sub>O</b> | <b>60</b>       | <b>17.94</b>            | <b>3.3</b>     | <b>1</b>                |
| Thiacetazone          | 236              | DMSO                  | 1000            | 236                     | 42             | 10                      |
